# Supplementary material for: A combined electro-optical deformability micro-cytometer
Source: Royal Society of Chemistry journal article supplement (doi:10.1039/d4ra04800h), 2024-01-01
Supplement: d4ra04800h2.pdf [file d4ra04800h2.pdf]

# Supplementary

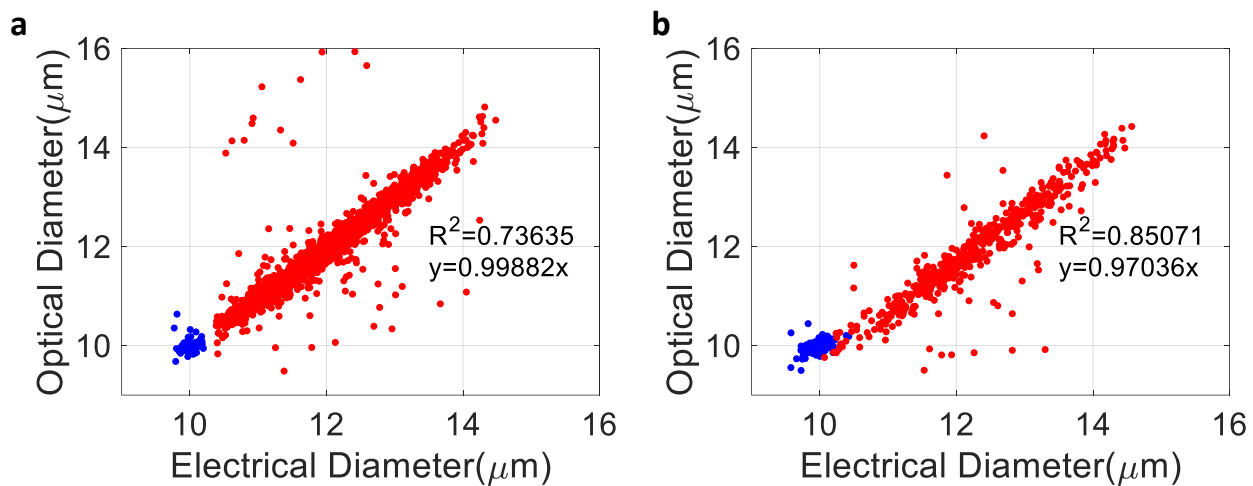

Figure S1 Correlation of optical and electrical diameter for untreated HL60 cells at (a) 10 $\mu\text{l}/\text{min}$  and (b) 15 $\mu\text{l}/\text{min}$ . Data was obtained for the same cells as the correlation plot in the text (Figure 3c) but with different flow rates.

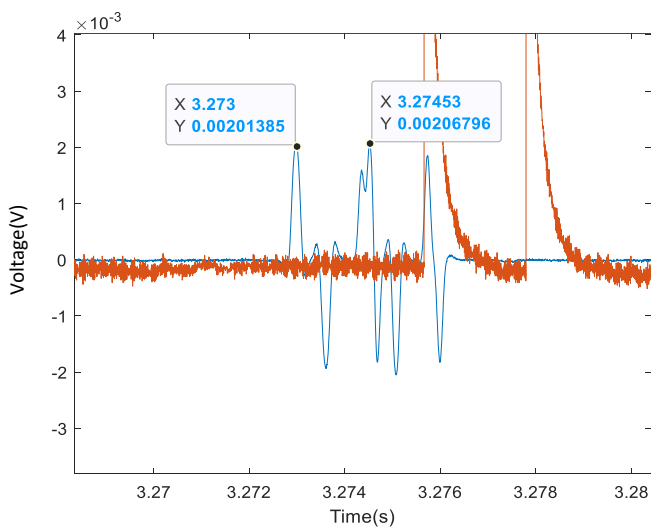

Figure S2 Example of impedance coincidence with the corresponding trigger signal. The time interval between these two particular events is 1.53 ms.
